# Supplementary material for: Notch Inhibition via GSI Treatment Elevates Protein Synthesis in C2C12 Myotubes
Source: MDPI journal article supplement (doi:10.3390/biology9060115), 2020-06-02
Supplement: s1 [file s1]

Supplementary

# Notch Inhibition via GSI Treatment Elevates Protein Synthesis in C2C12 Myotubes

Joshua R. Huot, Joseph S. Marino, Michael J. Turner and Susan T. Arthur

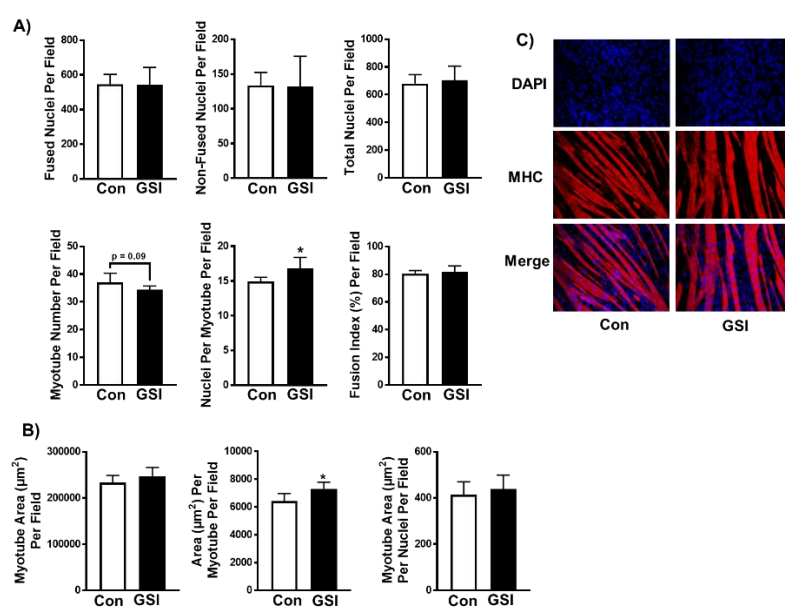

**Figure S1. GSI augments myotube hypertrophy in day 6 myotubes.** (A) Indices of myotube fusion. Graph order: Graph order: (top) Fused nuclei per field, Non-fused nuclei per field, Total nuclei per field, (bottom) Myotube number per field, Nuclei per myotube per field, Fusion index per field. (B) Indices of myotube hypertrophy. Graph order: Myotube area (μm) per field, Area (μm) per myotube per field, Myotube area (μm) per nuclei per field. (C) Representative image of 144-h myotubes co-stained with myosin heavy chain (MHC) and DAPI. Images were taken at 20x magnification and the scale bar = 50 μm. 120-h post differentiation C2C12 cells were treated every 12 h with either control (Con) or 4 μm γ-secretase inhibitor (GSI). Data were analyzed using a Student's T-test. \*  $p < 0.05$  vs. Con. ( $n = 2$  experiments). Data are mean ± SD.

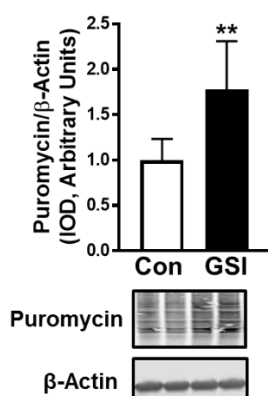

**Figure S2. GSI augments protein synthesis in day 6 myotubes.** Puromycin/β-Actin expression (Integrated optical density, IOD) in 144-h myotubes. 120-h post differentiation C2C12 cells were treated every 12 h with either control (Con) or 4 μm γ-secretase inhibitor (GSI). Thirty minutes prior to collection all cells were treated with 1 μm puromycin. For representative image: lanes 1 and 2 are

Con; lanes 3 and 4 are GSI. Data were analyzed using a Student's T-test. \*\*  $p \leq 0.01$  vs. Control (Con) ( $n = 3$  experiments). Data are mean  $\pm$  SD.

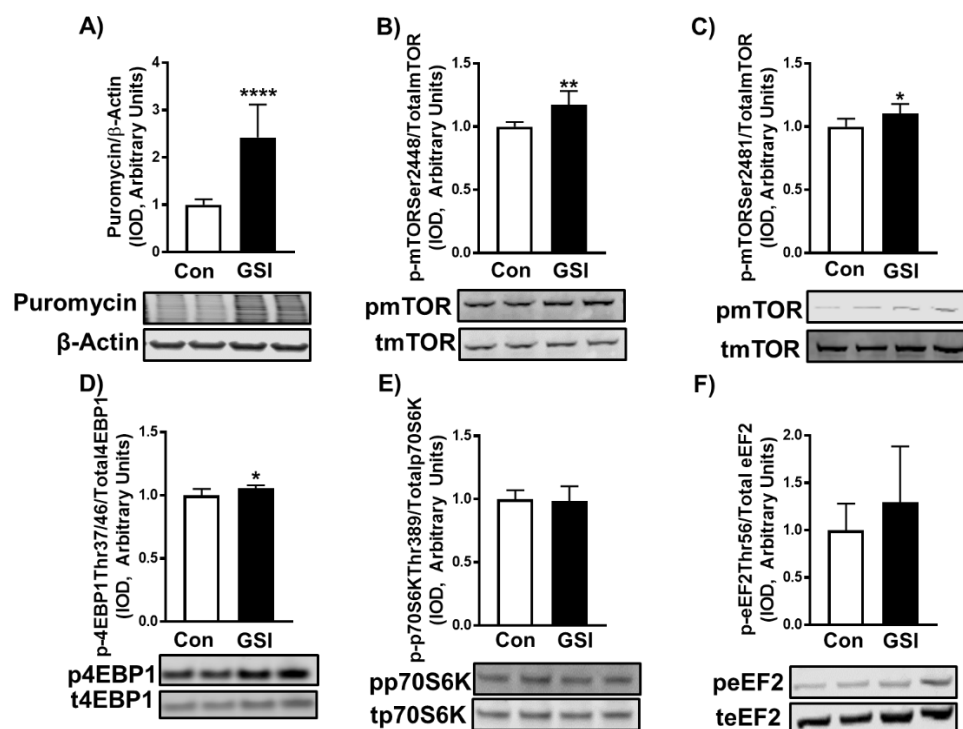

**Figure S3.** GSI elevates protein synthesis and mTOR signaling in C2C12 myoblasts. (A) Puromycin/ $\beta$ -Actin; (B) p-mTOR Ser2448/Total mTOR; (C) p-mTOR Ser2481/Total mTOR; (D) p-4EBP1 Thr37/46/Total 4EBP1; (E) pp70S6K Thr389/Total p70S6K; (F) p-eEF2 Thr56/Total eEF2 expression (Integrated optical density, IOD) in 48-h myoblasts treated with or without 4  $\mu$ m  $\gamma$ -secretase inhibitor (GSI) every 12 h. Thirty minutes prior to collection all cells were treated with 1  $\mu$ m puromycin. For representative image: lanes 1 and 2 are Con; lanes 3 and 4 are GSI. Data were analyzed using a Student's T-test. \*  $p \leq 0.05$  vs. Control (Con); \*\*  $p < 0.01$  vs. Con; \*\*\*\*  $p < 0.0001$  vs. Con ( $n = 3$  experiments). Data are mean  $\pm$  SD.

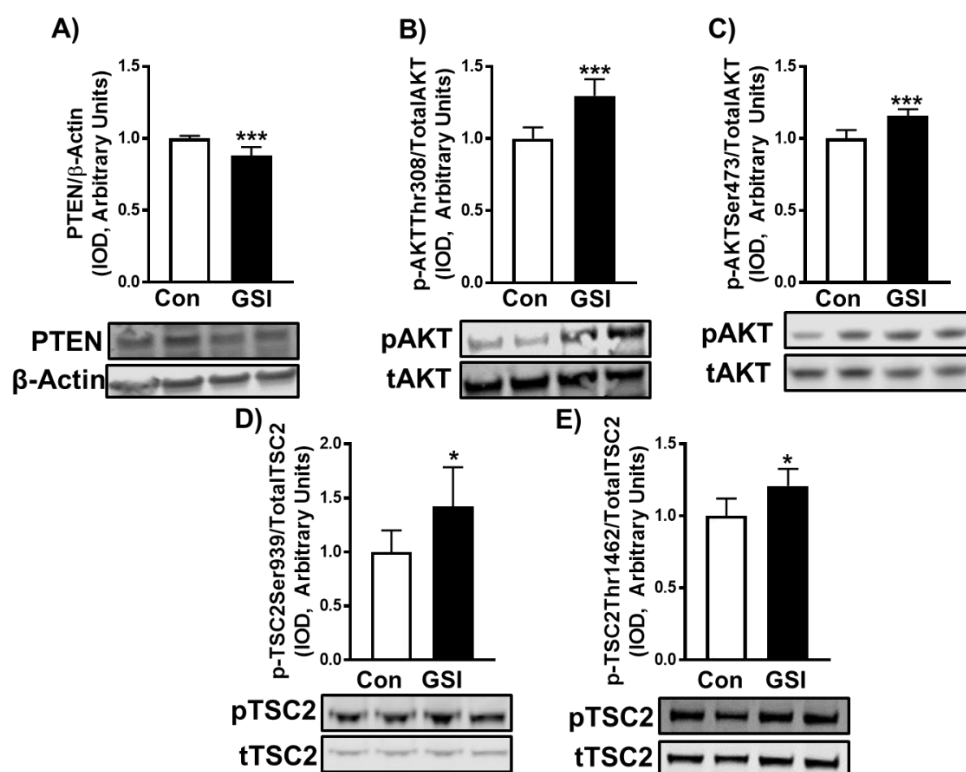

**Figure S4.** GSI modulates signaling upstream of mTOR in C2C12 myoblasts. (A) PTEN/β-Actin; (B) p-AKT Thr308/Total AKT; (C) p-AKT Ser473/Total AKT; (D) p-TSC2 Ser939/Total TSC2; (E) p-TSC2 Thr1462/Total TSC2 expression (Integrated optical density, IOD) in 48-h myoblasts treated with or without 4 μm γ-secretase inhibitor (GSI) every 12 h. Thirty minutes prior to collection all cells were treated with 1 μm puromycin. For representative image: lanes 1 and 2 are Con; lanes 3 and 4 are GSI. Data were analyzed using a Student's T-test. \*  $p \leq 0.05$  vs. Control (Con); \*\*\*  $p < 0.001$  vs. Con ( $n = 3$  experiments). Data are mean  $\pm$  SD.

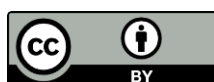

© 2020 by the authors. Submitted for possible open access publication under the terms and conditions of the Creative Commons Attribution (CC BY) license (<http://creativecommons.org/licenses/by/4.0/>).
